# Supplementary material for: Running-Related Biomechanical Risk Factors for Overuse Injuries in Distance Runners: A Systematic Review Considering Injury Specificity and the Potentials for Future Research
Source: PubMed Central journal article supplement (PMC9325808; doi:10.1007/s40279-022-01666-3), 2022-03-05
Supplement: 40279_2022_1666_MOESM1_ESM.pdf [file 40279_2022_1666_MOESM1_ESM.pdf]

## Supplementary Materials – Search Strings

### **Running related biomechanical risk factors for overuse injuries in distance runners: A systematic review considering injury specificity and the potentials for future research**

Steffen Willwacher<sup>1,3\*</sup>, Markus Kurz<sup>2</sup>, Johanna Robbin<sup>1,3</sup>, Matthias Thelen<sup>3</sup>, Joseph Hamill<sup>4</sup>, Luke Kelly<sup>5</sup>, Patrick Mai<sup>3</sup>

<sup>1</sup>Department for Mechanical and Process Engineering, Offenburg University of Applied Sciences, Offenburg, Germany

<sup>2</sup>Department of Quality Technology & Mechanical Engineering, Mid Sweden University, Östersund, Sweden

<sup>3</sup>Institute for Biomechanics and Orthopaedics, German Sport University Cologne, Cologne, Germany

<sup>4</sup>Biomechanics Laboratory, University of Massachusetts, Amherst, MA, USA

<sup>5</sup>School of Human Movement and Nutrition Sciences, University of Queensland, St. Lucia, Queensland, Australia

## Search Strings:

### **Achilles tendinopathy**

Date of Access: 5.2.2021: N = 242

(runn\*) AND (injur\* OR risk OR factor\* OR tend\* OR syndrome OR stress\* OR fasc\* OR pain) AND (prospective OR retrospective OR cross\* OR long\* OR follow\* OR case\* OR cohort\*) AND (achil\*) NOT (“addresses”[Publication Type] OR “bibliography”[Publication Type] OR “biography”[Publication Type] OR “case reports”[Publication Type] OR “clinical conference”[Publication Type] OR “comment”[Publication Type] OR “congresses”[Publication Type] OR “dictionary”[Publication Type] OR “directory”[Publication Type] OR “editorial”[Publication Type] OR “festschrift”[Publication Type] OR “government publications”[Publication Type] OR “interview”[Publication Type] OR “lectures”[Publication Type] OR “legal cases”[Publication Type] OR “legislation”[Publication Type] OR “letter”[Publication Type] OR “news”[Publication Type] OR “newspaper article”[Publication Type] OR “retracted publication”[Publication Type] OR “retraction of publication”[Publication Type] OR “review”[Publication Type] OR “review literature”[Publication Type] OR “review of reported cases”[Publication Type] OR “review, academic”[Publication Type] OR “review, multicase”[Publication Type] OR “review, tutorial”[Publication Type] OR “scientific integrity review”[Publication Type] OR “technical report”[Publication Type] OR “twin study”[Publication Type] OR “validation studies”[Publication Type]) AND “Humans”[Species]

### **iliotibial band friction**

Date of Access: 4.2.2021: N = 87

(runn\*) AND (injur\* OR risk OR factor\* OR tend\* OR syndrome OR stress\* OR fasc\* OR pain OR friction) AND (prospective OR retrospective OR cross\* OR long\* OR follow\* OR case\*) AND (ilio\*) NOT (“addresses”[Publication Type] OR “bibliography”[Publication Type] OR “biography”[Publication Type] OR “case reports”[Publication Type] OR “clinical conference”[Publication Type] OR “comment”[Publication Type] OR “congresses”[Publication Type] OR

“dictionary”[Publication Type] OR “directory”[Publication Type] OR “editorial”[Publication Type] OR “festschrift”[Publication Type] OR “government publications”[Publication Type] OR “interview”[Publication Type] OR “lectures”[Publication Type] OR “legal cases”[Publication Type] OR “legislation”[Publication Type] OR “letter”[Publication Type] OR “news”[Publication Type] OR “newspaper article”[Publication Type] OR “retracted publication”[Publication Type] OR “retraction of publication”[Publication Type] OR “review”[Publication Type] OR “review literature”[Publication Type] OR “review of reported cases”[Publication Type] OR “review, academic”[Publication Type] OR “review, multicase”[Publication Type] OR “review, tutorial”[Publication Type] OR “scientific integrity review”[Publication Type] OR “technical report”[Publication Type] OR “twin study”[Publication Type] OR “validation studies”[Publication Type]) AND “Humans”[Species]

### **Medial tibial stress syndrome**

Date of Access: 4.2.2021: N = 338

(runn\*) AND (injur\* OR risk OR factor\* OR tend\* OR syndrome OR stress\* OR fasc\* OR pain OR femu\* OR frac\* OR medial) AND (prospective OR retrospective OR cross\* OR long\* OR follow\* OR cohort) AND (tibia\*) NOT (“addresses”[Publication Type] OR “bibliography”[Publication Type] OR “biography”[Publication Type] OR “case reports”[Publication Type] OR “clinical conference”[Publication Type] OR “comment”[Publication Type] OR “congresses”[Publication Type] OR “dictionary”[Publication Type] OR “directory”[Publication Type] OR “editorial”[Publication Type] OR “festschrift”[Publication Type] OR “government publications”[Publication Type] OR “interview”[Publication Type] OR “lectures”[Publication Type] OR “legal cases”[Publication Type] OR “legislation”[Publication Type] OR “letter”[Publication Type] OR “news”[Publication Type] OR “newspaper article”[Publication Type] OR “retracted publication”[Publication Type] OR “retraction of publication”[Publication Type] OR “review”[Publication Type] OR “review literature”[Publication Type] OR “review of reported cases”[Publication Type] OR “review, academic”[Publication Type] OR “review, multicase”[Publication Type] OR “review, tutorial”[Publication Type] OR “scientific integrity review”[Publication Type] OR “technical report”[Publication Type] OR “twin study”[Publication Type] OR “validation studies”[Publication Type]) AND “Humans”[Species]

## **Tibia stress fracture**

Date of Access: 5.2.2021: N = 323

(runn\*) AND (injur\* OR risk OR factor\* OR tend\* OR syndrome OR stress\* OR fasc\* OR pain OR femu\* OR frac\*) AND (prospective OR retrospective OR cross\* OR long\* OR follow\* OR cohort) AND (tibia\*) NOT (“addresses”[Publication Type] OR “bibliography”[Publication Type] OR “biography”[Publication Type] OR “case reports”[Publication Type] OR “clinical conference”[Publication Type] OR “comment”[Publication Type] OR “congresses”[Publication Type] OR “dictionary”[Publication Type] OR “directory”[Publication Type] OR “editorial”[Publication Type] OR “festschrift”[Publication Type] OR “government publications”[Publication Type] OR “interview”[Publication Type] OR “lectures”[Publication Type] OR “legal cases”[Publication Type] OR “legislation”[Publication Type] OR “letter”[Publication Type] OR “news”[Publication Type] OR “newspaper article”[Publication Type] OR “retracted publication”[Publication Type] OR “retraction of publication”[Publication Type] OR “review”[Publication Type] OR “review literature”[Publication Type] OR “review of reported cases”[Publication Type] OR “review, academic”[Publication Type] OR “review, multicase”[Publication Type] OR “review, tutorial”[Publication Type] OR “scientific integrity review”[Publication Type] OR “technical report”[Publication Type] OR “twin study”[Publication Type] OR “validation studies”[Publication Type]) AND “Humans”[Species]

## **Plantar fasciitis**

Date of Access: 5.2.2021: N = 79

(runn\*) AND (injur\* OR risk OR factor\* OR tend\* OR syndrome OR stress\* OR fasc\* OR pain) AND (prospective OR retrospective OR cross\* OR long\* OR follow\* OR case\* OR cohort\*) AND ((plant\* AND fasc\*) OR (heel\* AND spur\*)) NOT (“addresses”[Publication Type] OR “bibliography”[Publication Type] OR “biography”[Publication Type] OR “case reports”[Publication Type] OR “clinical conference”[Publication Type] OR “comment”[Publication Type] OR “congresses”[Publication Type] OR “dictionary”[Publication Type] OR “directory”[Publication Type] OR “editorial”[Publication Type] OR “festschrift”[Publication Type] OR “government publications”[Publication Type] OR “interview”[Publication Type] OR “lectures”[Publication Type] OR “legal cases”[Publication Type] OR “legislation”[Publication Type] OR “letter”[Publication Type] OR “news”[Publication Type] OR “newspaper article”[Publication Type] OR “retracted publication”[Publication Type] OR “retraction of publication”[Publication Type] OR “review”[Publication Type] OR “review literature”[Publication Type] OR “review of reported cases”[Publication Type] OR “review, academic”[Publication Type] OR “review, multicase”[Publication Type] OR “review, tutorial”[Publication Type] OR “scientific integrity review”[Publication Type] OR “technical report”[Publication Type] OR “twin study”[Publication Type] OR “validation studies”[Publication Type]) AND “Humans”[Species]

## **Patellofemoral pain syndrome**

Date of Access: am 5.2.2021: N = 262

(runn\*) AND (injur\* OR risk OR factor\* OR tend\* OR syndrome OR stress\* OR fasc\* OR pain OR femo\* OR femu\*) AND (prospective OR retrospective OR cross\* OR long\* OR follow\* OR cohort) AND (patel\*) NOT (“addresses”[Publication Type] OR “bibliography”[Publication Type] OR “biography”[Publication Type] OR “case reports”[Publication Type] OR “clinical conference”[Publication Type] OR “comment”[Publication Type] OR “congresses”[Publication Type] OR “dictionary”[Publication Type] OR “directory”[Publication Type] OR

“editorial”[Publication Type] OR “festschrift”[Publication Type] OR “government publications”[Publication Type] OR “interview”[Publication Type] OR “lectures”[Publication Type] OR “legal cases”[Publication Type] OR “legislation”[Publication Type] OR “letter”[Publication Type] OR “news”[Publication Type] OR “newspaper article”[Publication Type] OR “retracted publication”[Publication Type] OR “retraction of publication”[Publication Type] OR “review”[Publication Type] OR “review literature”[Publication Type] OR “review of reported cases”[Publication Type] OR “review, academic”[Publication Type] OR “review, multicase”[Publication Type] OR “review, tutorial”[Publication Type] OR “scientific integrity review”[Publication Type] OR “technical report”[Publication Type] OR “twin study”[Publication Type] OR “validation studies”[Publication Type]) AND “Humans”[Species]

### **Patellar tendinopathy Jumpers knee**

Date of Access: 5.2.2021: N = 262

(runn\*) AND (injur\* OR risk OR factor\* OR tend\* OR syndrome OR stress\* OR fasc\* OR pain OR femo\* OR femu\*) AND (prospective OR retrospective OR cross\* OR long\* OR follow\* OR cohort) AND (patel\* OR (jump\* AND knee\*)) NOT (“addresses”[Publication Type] OR “bibliography”[Publication Type] OR “biography”[Publication Type] OR “case reports”[Publication Type] OR “clinical conference”[Publication Type] OR “comment”[Publication Type] OR “congresses”[Publication Type] OR “dictionary”[Publication Type] OR “directory”[Publication Type] OR “editorial”[Publication Type] OR “festschrift”[Publication Type] OR “government publications”[Publication Type] OR “interview”[Publication Type] OR “lectures”[Publication Type] OR “legal cases”[Publication Type] OR “legislation”[Publication Type] OR “letter”[Publication Type] OR “news”[Publication Type] OR “newspaper article”[Publication Type] OR “retracted publication”[Publication Type] OR “retraction of publication”[Publication Type] OR “review”[Publication Type] OR “review literature”[Publication Type] OR “review of reported cases”[Publication Type] OR “review, academic”[Publication Type] OR “review, multicase”[Publication Type] OR “review, tutorial”[Publication Type] OR “scientific integrity review”[Publication Type] OR “technical report”[Publication Type]

OR "twin study"[Publication Type] OR "validation studies"[Publication Type]) AND "Humans"[Species]

### **Hamstring tendinopathy**

Date of Access: 5.2.2021: N = 164

(runn\*) AND (injur\* OR risk OR factor\* OR tend\* OR syndrome OR stress\* OR fasc\* OR pain) AND (prospective OR retrospective OR cross\* OR long\* OR follow\* OR case\* OR cohort) AND (hamstring\*) NOT ("addresses"[Publication Type] OR "bibliography"[Publication Type] OR "biography"[Publication Type] OR "case reports"[Publication Type] OR "clinical conference"[Publication Type] OR "comment"[Publication Type] OR "congresses"[Publication Type] OR "dictionary"[Publication Type] OR "directory"[Publication Type] OR "editorial"[Publication Type] OR "festschrift"[Publication Type] OR "government publications"[Publication Type] OR "interview"[Publication Type] OR "lectures"[Publication Type] OR "legal cases"[Publication Type] OR "legislation"[Publication Type] OR "letter"[Publication Type] OR "news"[Publication Type] OR "newspaper article"[Publication Type] OR "retracted publication"[Publication Type] OR "retraction of publication"[Publication Type] OR "review"[Publication Type] OR "review literature"[Publication Type] OR "review of reported cases"[Publication Type] OR "review, academic"[Publication Type] OR "review, multicase"[Publication Type] OR "review, tutorial"[Publication Type] OR "scientific integrity review"[Publication Type] OR "technical report"[Publication Type] OR "twin study"[Publication Type] OR "validation studies"[Publication Type]) AND "Humans"[Species]
